# Supplementary material for: Single cell RNAseq provides a molecular and cellular cartography of changes to the human endometrium through the menstrual cycle
Source: bioRxiv or medRxiv preprint supplement (doi:10.1101/350538), 2019-05-08
Supplement: Supplementary file [file 350538-1.pdf]

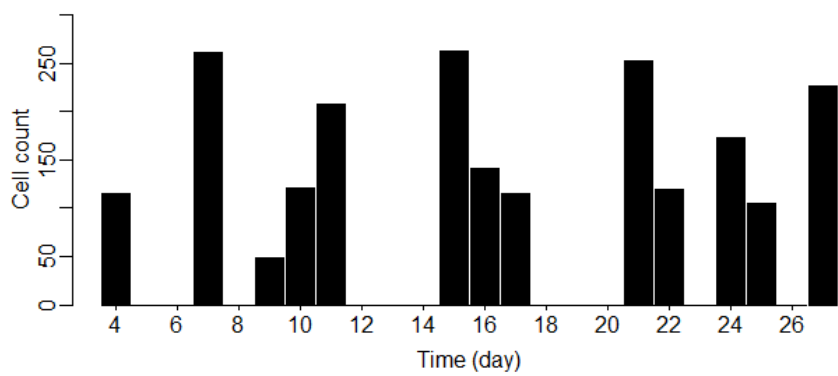

**Figure S1. Distribution of number of cells sampled across the menstrual cycle. (Day: the day of menstrual cycle)**

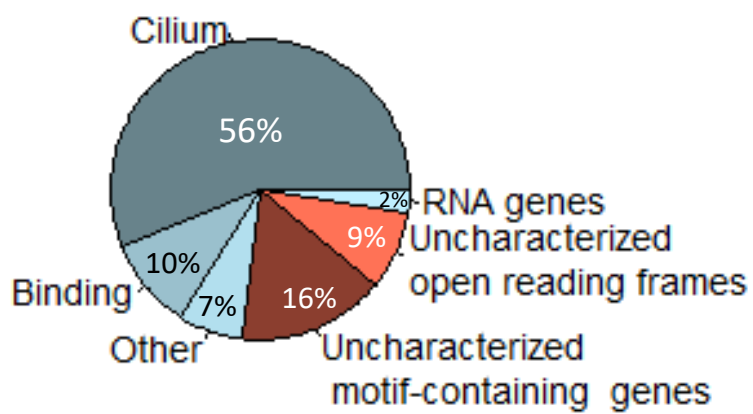

**Figure S2.** Classification and distribution of functional annotations for uniquely expressed genes in ciliated epithelium.

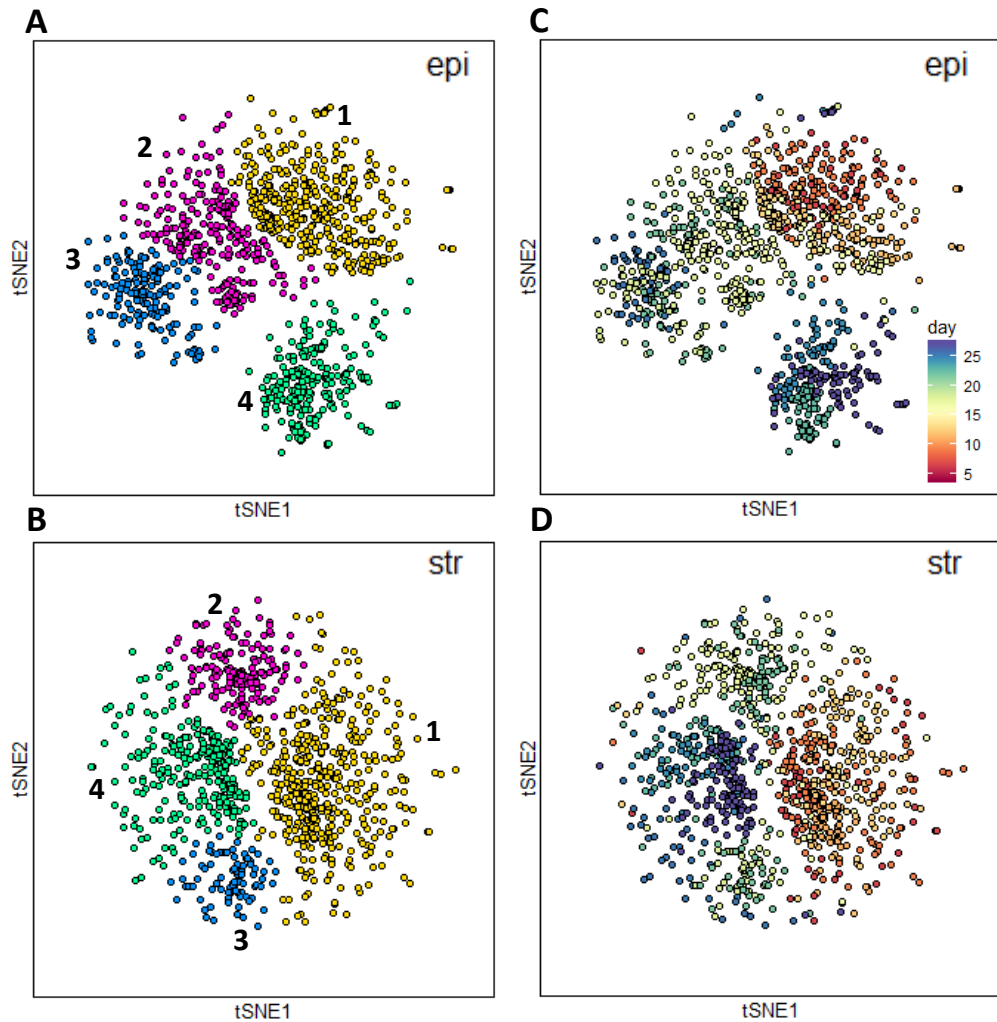

**Figure S3. Unbiased definition of major phases of endometrial transformation across the menstrual cycle. A. B.** Dimension reduction (tSNE) using whole transcriptome information and phase assignment using Ward's hierarchical agglomerative clustering method. **C. D.** tSNE cast with time. (epi: unciliated epithelium; str: stroma; day: the day of menstrual cycle)

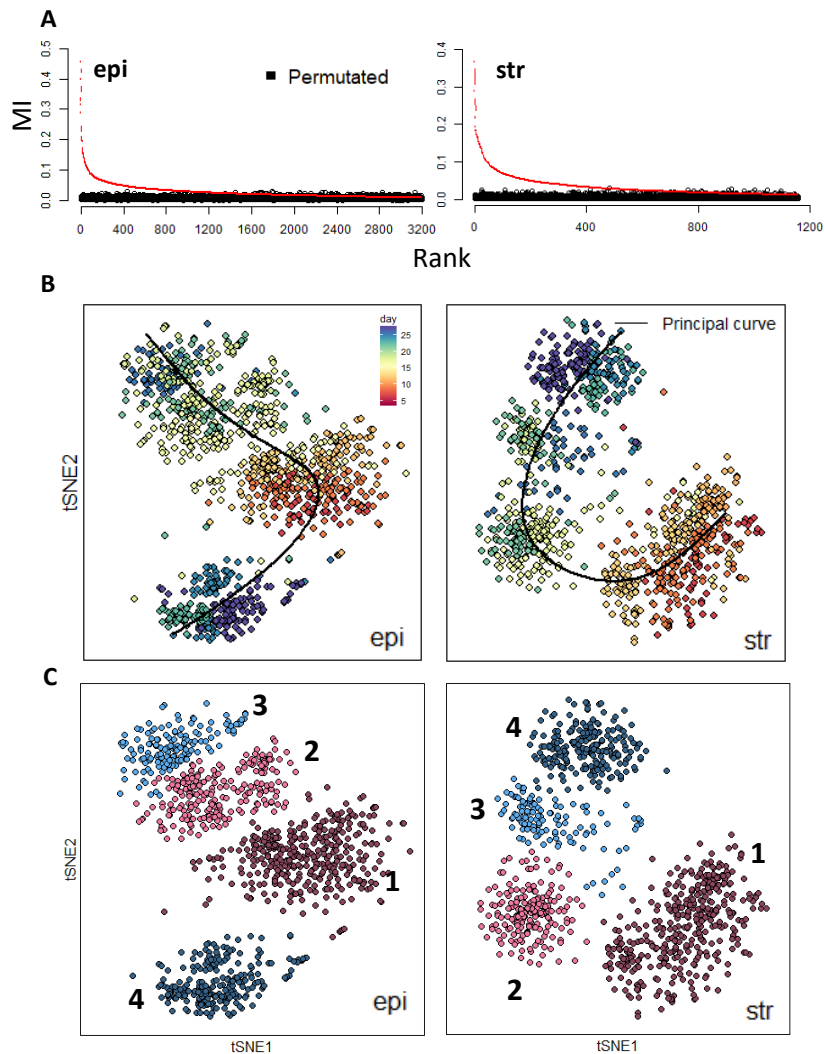

**Figure S4. Constructing trajectories of endometrial transformation across the menstrual cycle via mutual information (MI) based approach.** **A.** MI between expression of genes and time (red) or permuted time (black) for unciliated epithelium (epi) and stroma (str) cells. (Genes are ranked by MI) **B.** tSNE using time-associated genes and trajectories of endometrial transformation defined by principal curves. **C.** Phase assignment using Ward's hierarchical agglomerative clustering method.

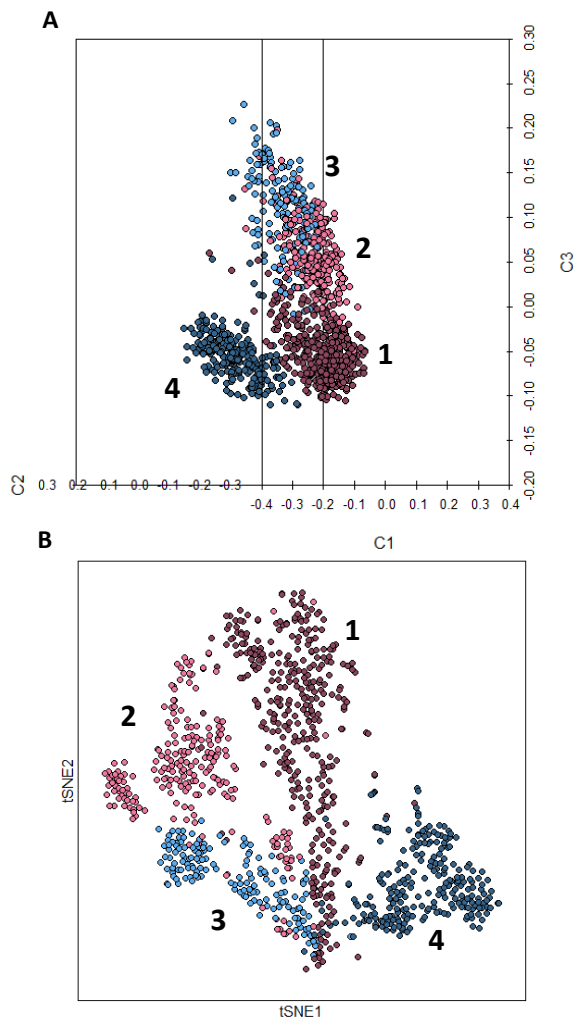

**Figure S5. Discontinuity of phase 4 unciliated epithelium (epi) obtained using different analysis methods. A.** First 3 components of multidimensional scaling on epi using whole transcriptome information. **B.** tSNE on top 50 principal components obtained via principal component analysis on whole transcriptome information. (Numbers 1-4: phase assignment determined in Fig. S4C)

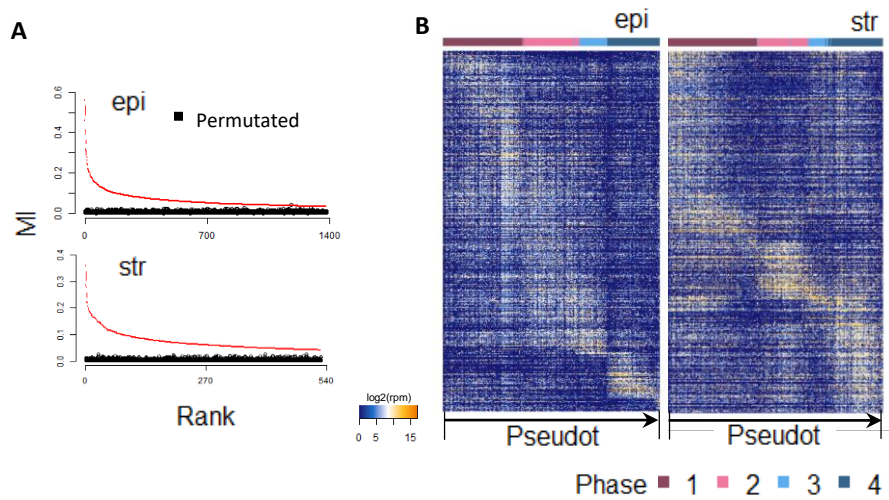

**Figure S6. Global temporal transcriptome dynamics across the menstrual cycle.** **A.** MI between expression of pseudotime-associated genes (FDR<1E-05) and pseudotime (red) or permutated pseudotime (black) for unciliated epithelium (epi) and stroma (str) cells. **B.** Dynamics of pseudotime associated genes across the trajectory of menstrual cycle.

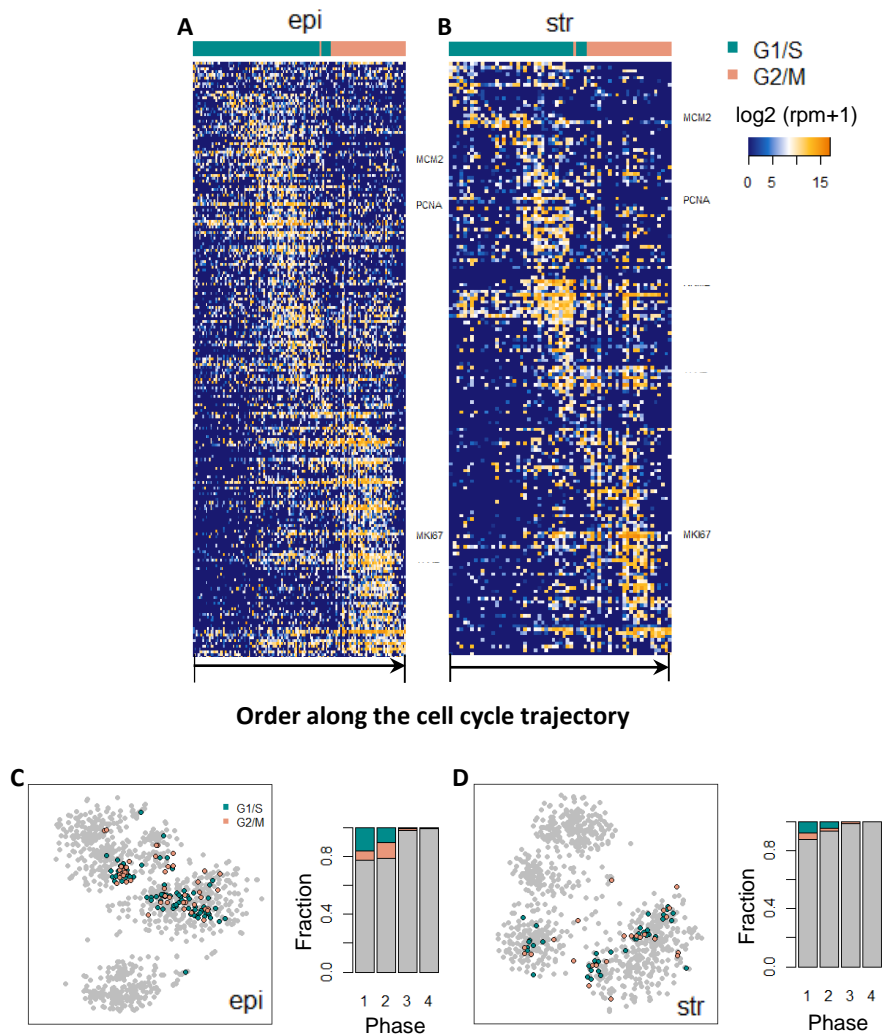

**Figure S7. Cell cycle dynamics in human endometrium across the menstrual cycle.** Endometrial G1/S and G2/M signatures in endometrial cycling for **(A)** unciliated epithelial (epi) and **(B)** stromal (str) cells. **C. D.** Distribution (left) and fractional dynamics (right) of cycling cells across major phases of the menstrual cycle.

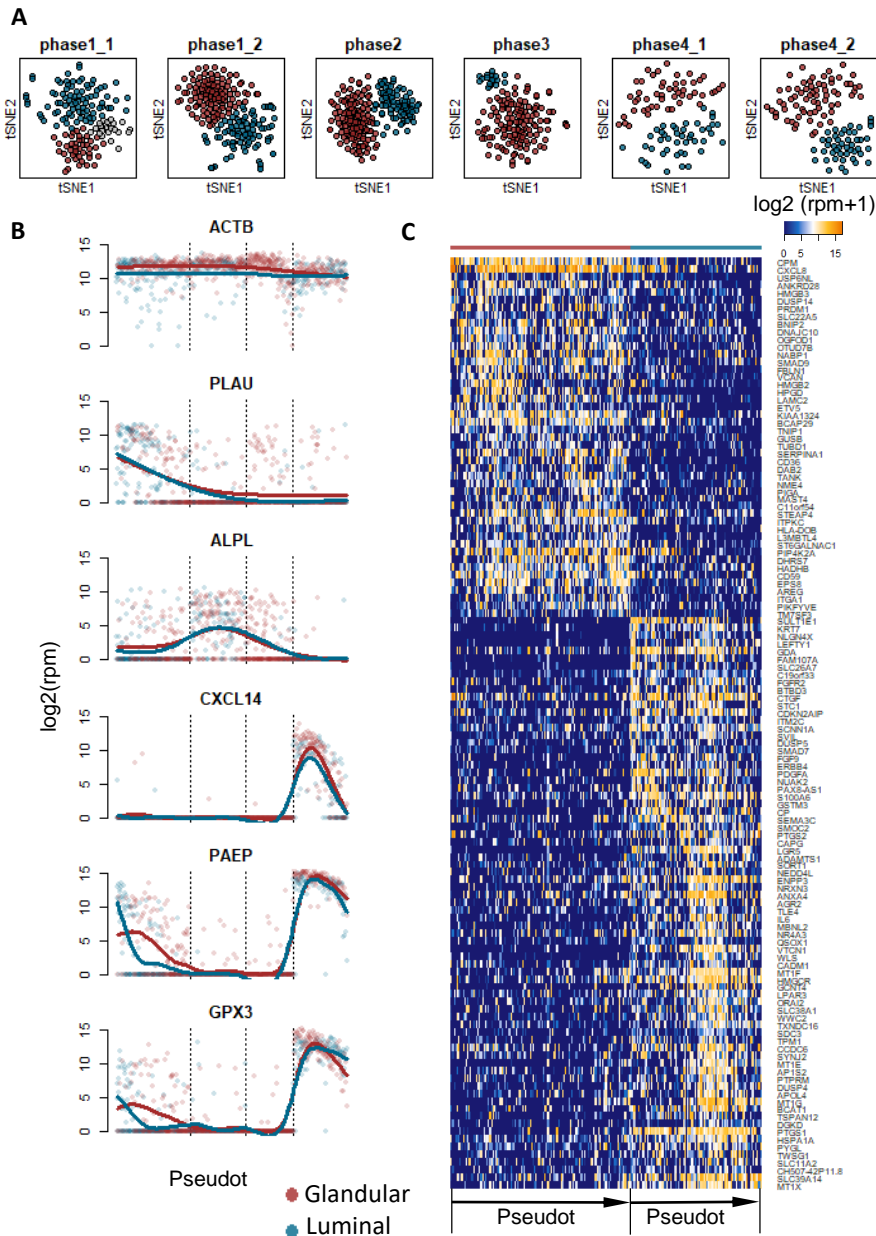

**Figure S8. Deviation of subpopulations of unciliated epithelial cells through the trajectory of the menstrual cycle. A.** Dimension reduction (tSNE) on unciliated epithelial cells at the major phases/sub-phases across the menstrual cycle. **B.** Dynamics of phase-defining and house keeping genes in subpopulations in unciliated epithelia across the menstrual cycle. (dashed lines: boundaries between 4 phases) **C.** Dynamics of differentially expressed genes between the two subpopulations during phase 2.



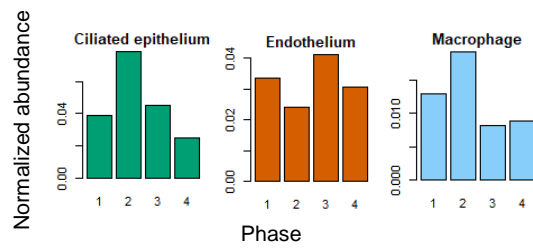

**Figure S9. Phase-associated abundance of minor endometrial cell types.** Abundance was normalized to total number of unciliated epithelial (ciliated epithelium) or stromal (endothelium, macrophage) single cells captured.

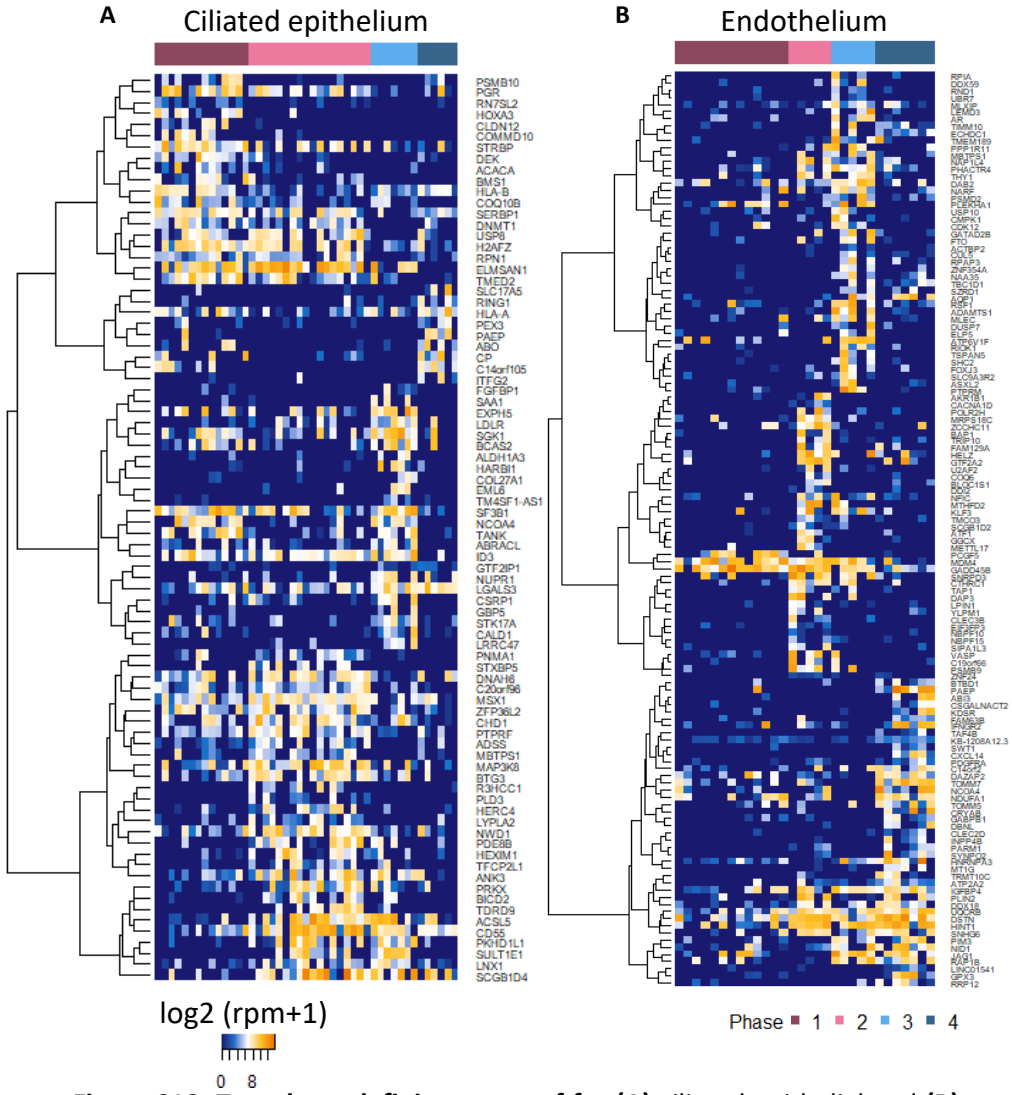

**Figure S10. Top phase-defining genes of for (A) ciliated epithelial and (B) endothelial cells.**

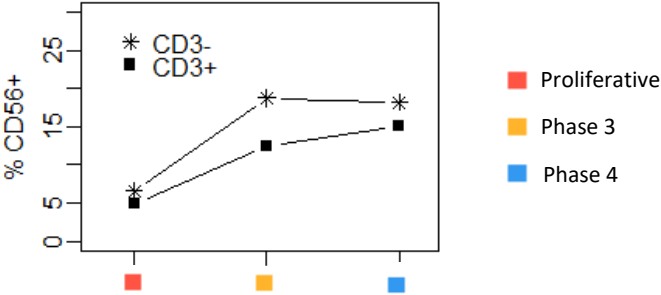

**Figure S11. Percent of CD56+ cells in all CD3+ and CD3- lymphocytes across the menstrual cycle.**
